# Supplementary material
Source: Springer Nature journal article supplement (https://www.springermedizin.de/resource/supplementary/12885_2010_2733_MOESM4_ESM.pdf/9461916)

**A****P = 0.03**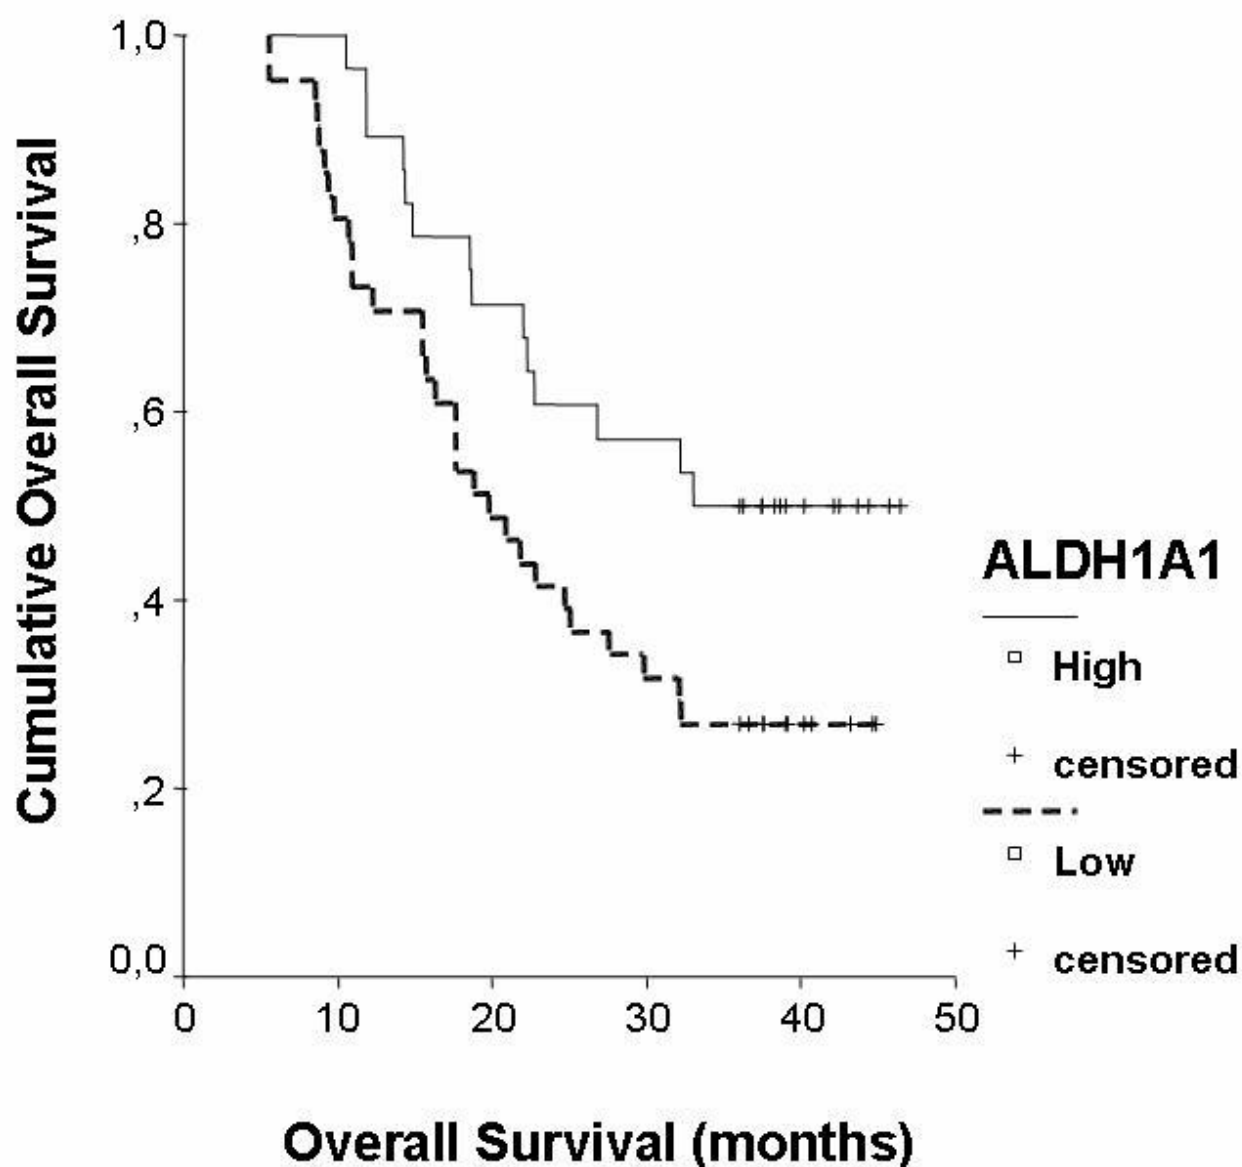**B****P = 0.07**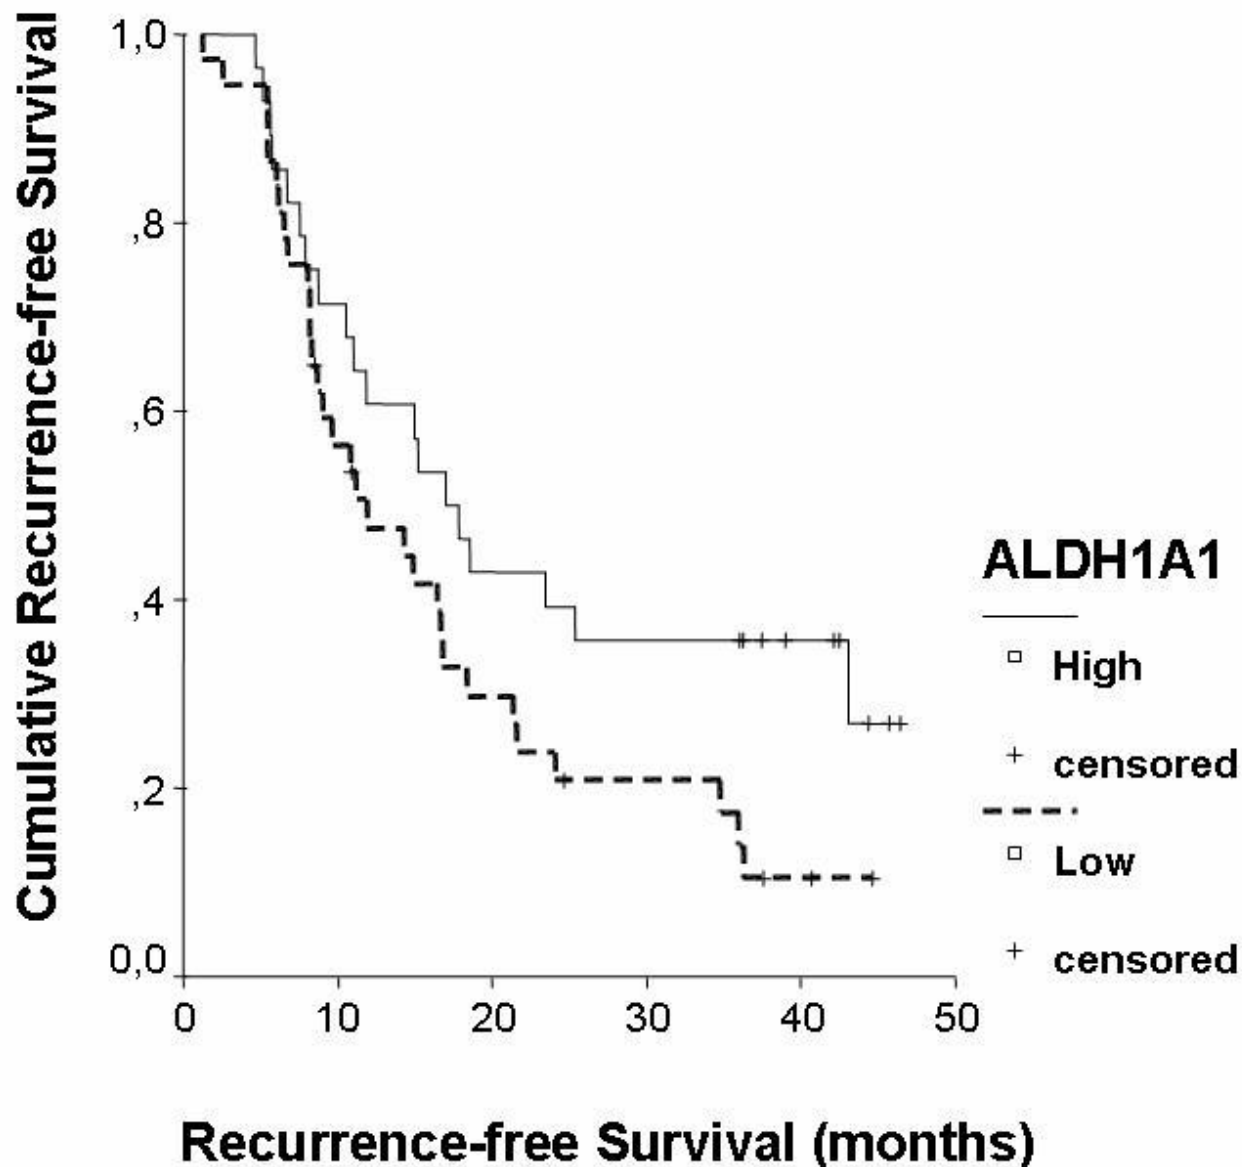

Supplement: MOESM4 [file 9461916]
